# Supplementary material for: Development of titanium doped hydroxyapatite for efficient removal of radioactive strontium from contaminated water
Source: Royal Society of Chemistry journal article supplement (doi:10.1039/d2nj04860d), 2022-11-16
Supplement: d2nj04860d1.pdf [file d2nj04860d1.pdf]

## **Supplementary Material**

### **Development of titanium doped hydroxyapatite for efficient removal of radioactive strontium from contaminated water**

Syeda Zil-e-Huma Ejaz<sup>1,2a</sup>, Sajid Iqbal<sup>1a\*</sup>, Shabnam Shahida<sup>2</sup>, Syed Muhammad Husnain<sup>1</sup>,  
Muhammad Saifullah<sup>1</sup>

<sup>1</sup>Chemistry Division, Pakistan Institute of Nuclear Science and Technology (PINSTECH), P.O. Nilore, Islamabad, Pakistan

<sup>2</sup>Department of Chemistry, University of Poonch, Rawalakot, Azad Jammu and Kashmir, Pakistan

\*Corresponding Author: [sajid1@alumni.kaist.ac.kr](mailto:sajid1@alumni.kaist.ac.kr)

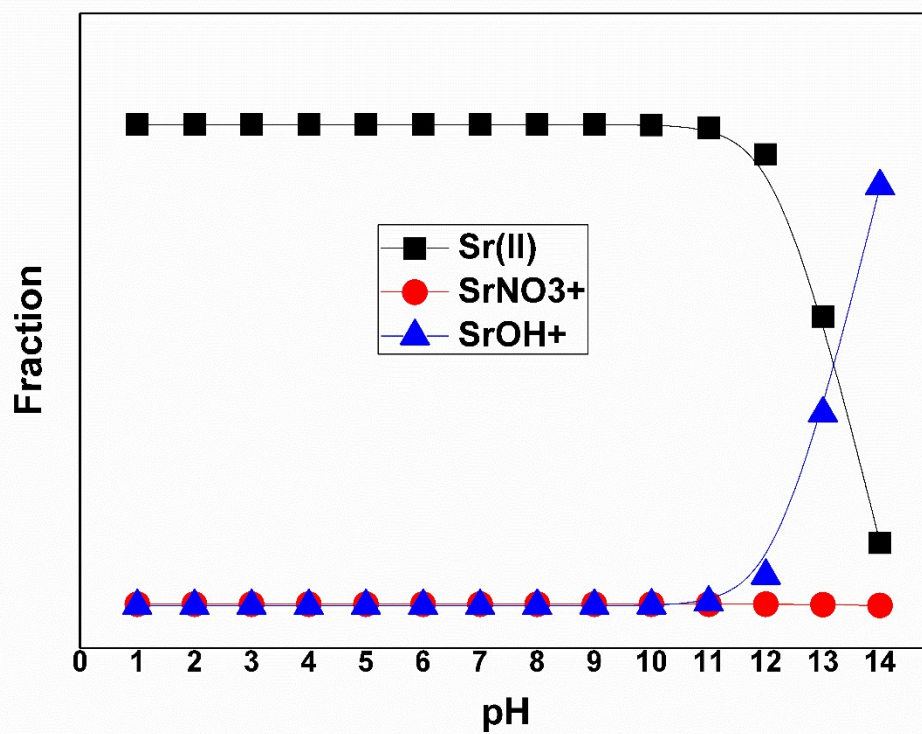

Figure S1: Speciation diagrams for the  $\text{Sr}(\text{NO}_3)_2 \cdot 4\text{H}_2\text{O}$  in aqueous media against pH calculated by chemical speciation modeling software (MINTEQA 3.1) at the Sr concentration of 50 mg/L in the deionized water matrix
